# Supplementary material
Source: publisher site journal article supplement (https://www.dovepress.com/article/603143)
Supplement: Supplementary file 1 [file 603143%20Supplementary%20Material_1.docx]

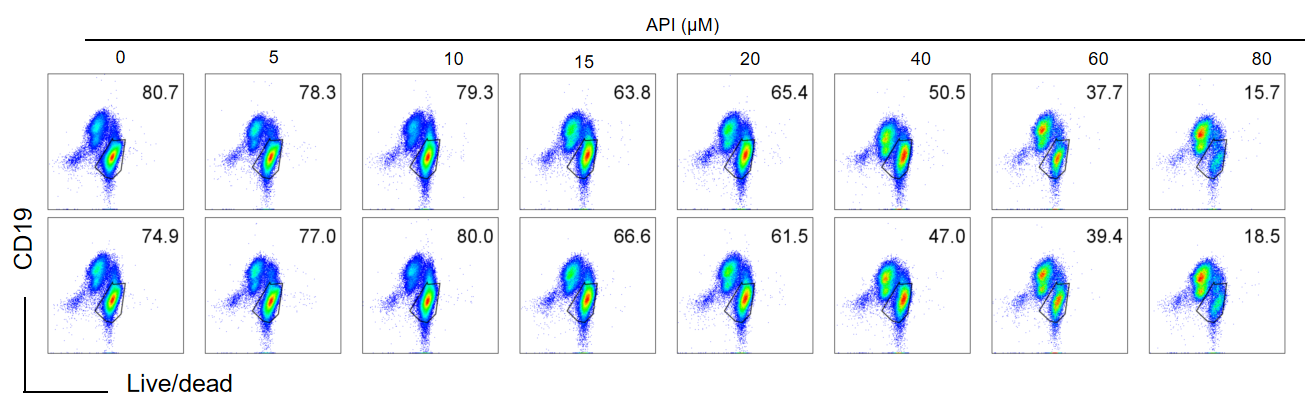


**Figure S1 The cytotoxity of API on mouse splenic B cells.** Splenic B cells from C57BL/6J mice were cultured with or without LPS (1 µg/mL) and using different concentrations of apigenin for 48 hours. Representative flow cytometry plots in CD19⁺ gated cells.

**Figure S2 Apigenin ameliorates synovial inflammation in CIA mice.** The changes in the weight of mice.

**Table S1. Clinical scoring criteria for murine arthritis**

| Arthritis Score | Description of Joint Symptoms |
| --- | --- |
| 0 | No signs of joint swelling or erythema |
| 1 | Mild swelling/erythema of the wrist or ankle joint |
| 2 | Mild swelling/erythema extending from the ankle to the metatarsal or metacarpal joints |
| 3 | Moderate swelling/erythema extending from the ankle to the metatarsophalangeal or metacarpophalangeal joints |
| 4 | Severe joint destruction with loss of integrity and widened joint space |

**Table S2. Histopathological scoring criteria for bone and joint destruction in mice**

| Bone Destruction Score | Description of Histopathological Features |
| --- | --- |
| 0 | Normal bone and joint architecture without pathological changes. |
| 1 | Mild synovial hyperplasia with inflammatory cell infiltration. |
| 2 | Mild pannus formation with initial cartilage destruction. |
| 3 | Extensive cartilage destruction. |
| 4 | Loss of joint integrity, marked widening of the joint space, and severe structural damage. |

**Table S3. Histopathological scoring criteria for lung injury**

| Pathological Feature | Description of Severity | Score |
| --- | --- | --- |
| Alveolar Epithelial Cell Necrosis | None | 0 |
| Mild (focal necrosis of a few alveolar epithelial cells) | 1 |
| Moderate (multifocal necrosis forming necrotic foci) | 2 |
| Severe (confluent or patchy necrosis of alveolar epithelial cells) | 3 |
| Inflammatory Cell Infiltration | None | 0 |
| Mild (scattered infiltration of a few inflammatory cells) | 1 |
| Moderate (increased number of inflammatory cell aggregates) | 2 |
| Severe (extensive and diffuse inflammatory cell infiltration) | 3 |
| Hemorrhage | None | 0 |
| Mild | 1 |
| Moderate | 2 |
| Severe | 3 |
| Interstitial Edema | None | 0 |
| Mild | 1 |
| Moderate | 2 |
| Severe | 3 |
